# Supplementary material
Source: MDPI journal article supplement (https://www.mdpi.com/2624-8549/5/3/121)
Supplement: s1 [file s1 › chemistry-2516820-supplementary.pdf]

# Blue-Emitting 2D- and 3D-Zinc Coordination Polymers Based on Schiff-Base Amino Acid Ligands

Rodavgi Karakousi <sup>1</sup>, Pinelopi A. Tsami <sup>1</sup>, Maria-Areti I. Spanoudaki <sup>1</sup>, Scott J. Dalgarno <sup>2</sup>,  
Vassileios C. Papadimitriou <sup>1,3,4,\*</sup> and Constantinos J. Milios <sup>1,\*</sup>

<sup>1</sup> Department of Chemistry, The University of Crete, 71003 Herakleion, Greece;  
chem2077@edu.chemistry.uoc.gr (R.K.); chemp1156@edu.chemistry.uoc.gr (P.A.T.);  
chemp1166@edu.chemistry.uoc.gr (M.-A.I.S.)

<sup>2</sup> Institute of Chemical Sciences, Heriot-Watt University, Riccarton, Edinburgh, Scotland  
EH14 4AS, UK; s.j.dalgarno@hw.ac.uk

<sup>3</sup> Chemical Sciences Laboratory, National Oceanic and Atmospheric Administration,  
Boulder, CO 80305, USA

<sup>4</sup> Cooperative Institute for Research in Environmental Sciences, University of Colorado,  
Boulder, CO 80309, USA

\* Correspondence: bpapadim@uoc.gr (V.C.P.); komil@uoc.gr (C.J.M.)

**Optical studies**

Samples of **1** and **2** were ultrasonically pretreated in MeOH for 20' at room temperature to assist dissolution, due to their poor solubility. The batch solutions were further diluted so as to ensure that the measured absorbance values lie within the linear response range of Beer-Lambert range ( $A < 0.7$ ).

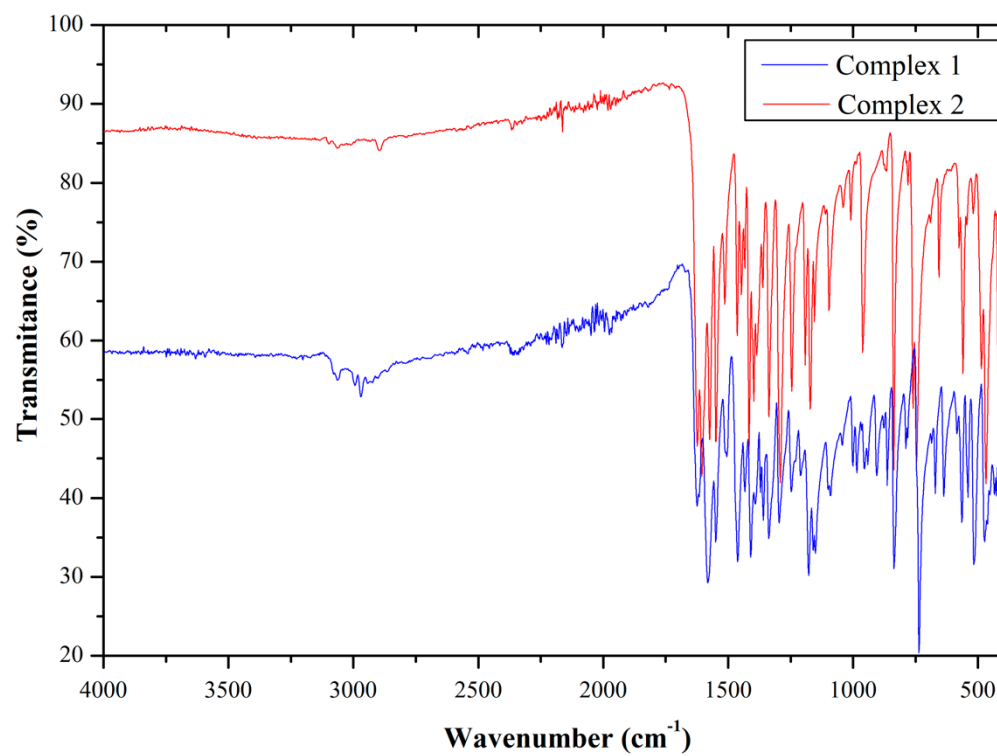

**Figure S1.** FT-ATIR spectra of **1** and **2**.

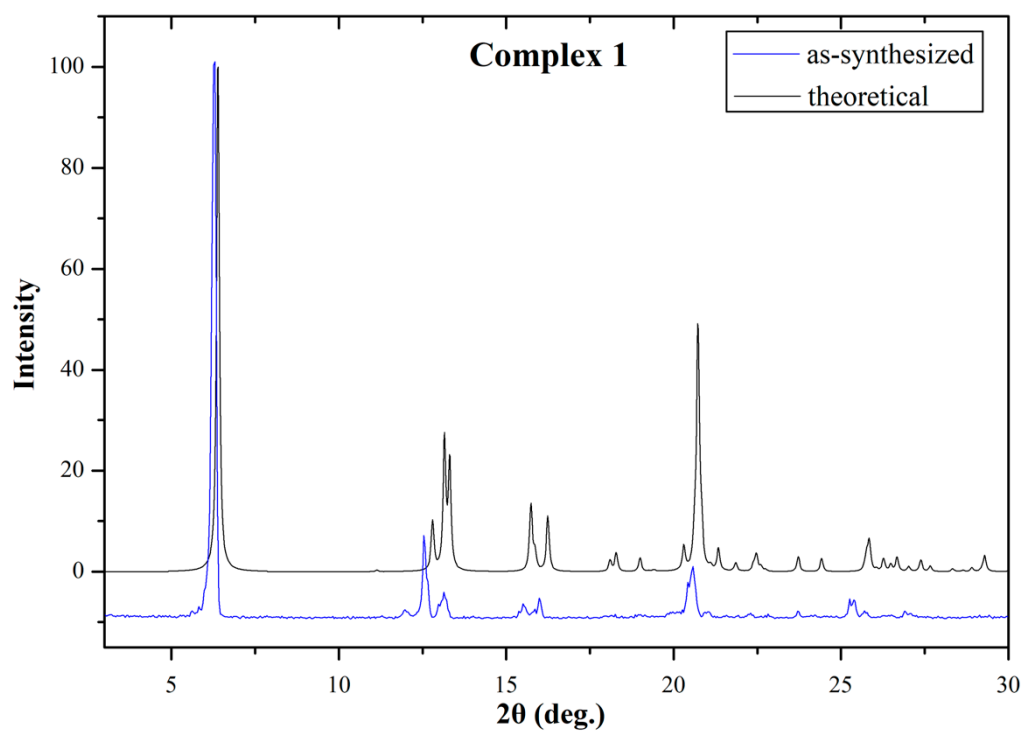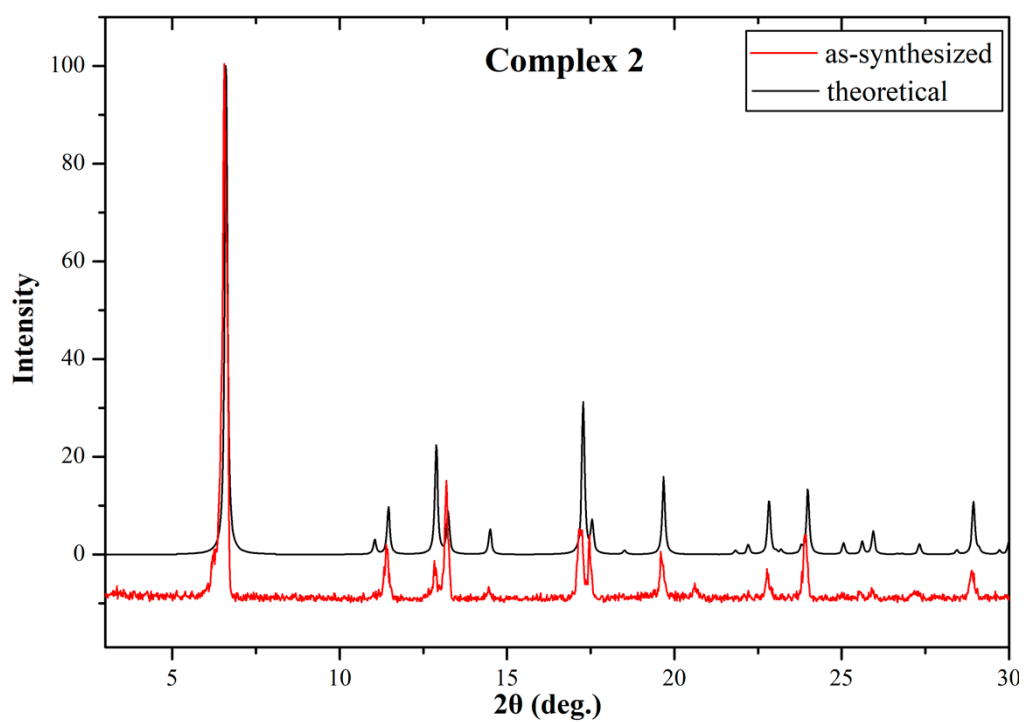

**Figure S2.** PXRD patterns for **1** (top) and **2** (bottom).

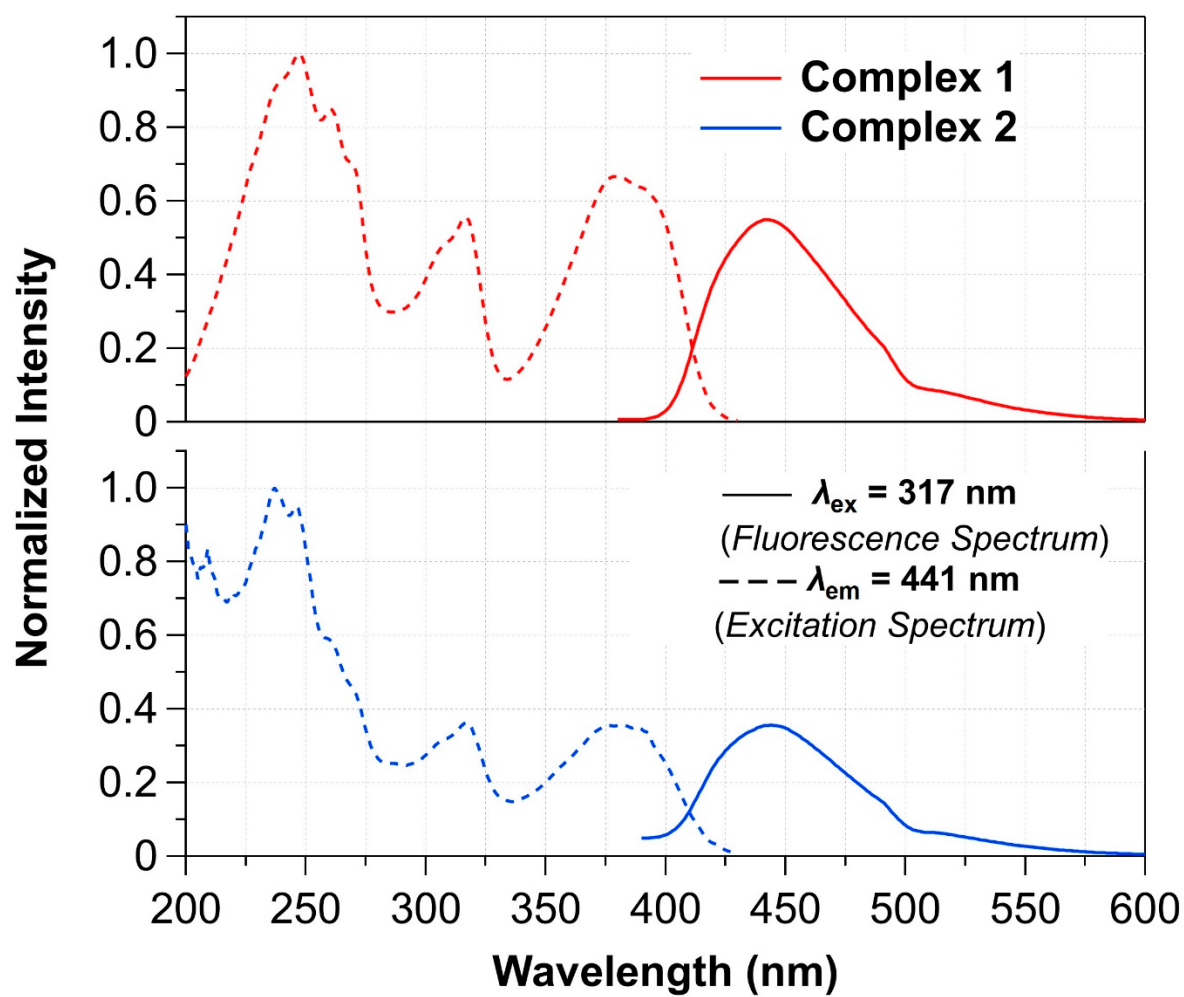

**Figure S3.** Solutions normalized excitation ( $\lambda_{em} = 441$  nm) and fluorescence ( $\lambda_{ex} = 317$  nm) spectra for complexes **1** and **2**.

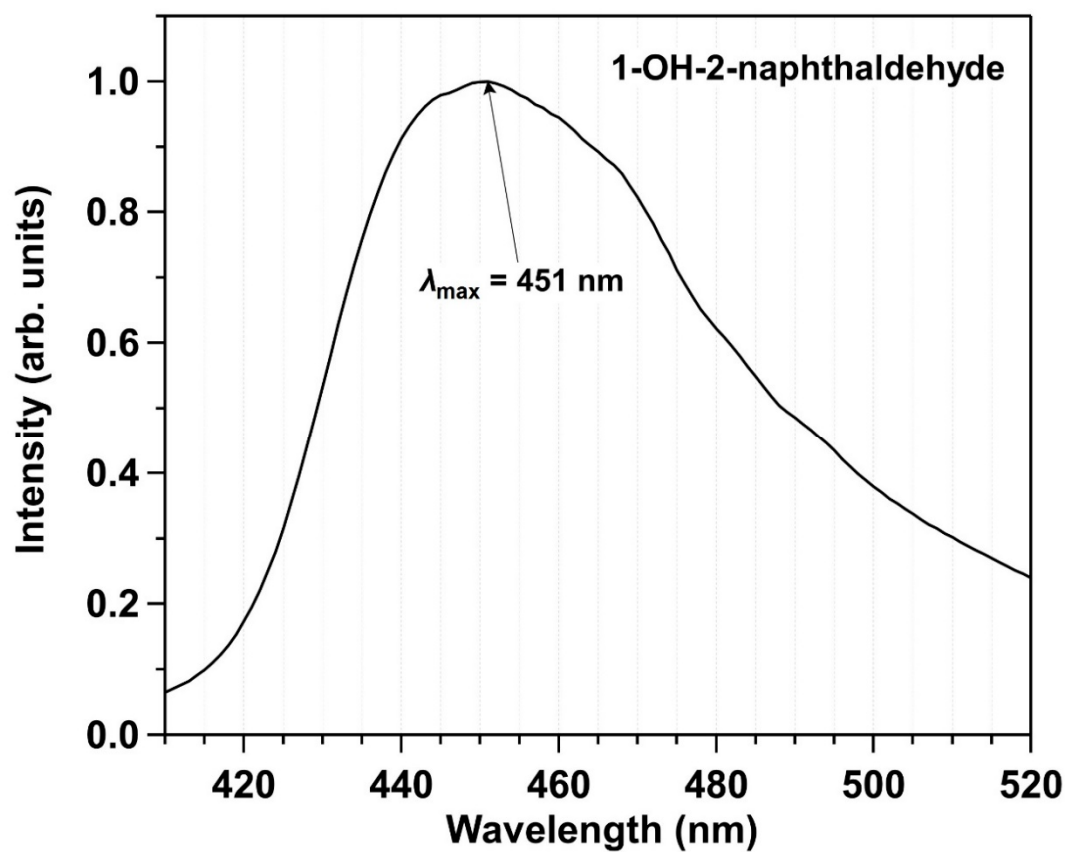

**Figure S4.** Solid-state fluorescence normalized spectrum of 1-OH-2-naphthaldehyde using 317 nm as excitation wavelength.
